# Supplementary material for: LKB1 Regulates Lipid Oxidation During Exercise Independently of AMPK
Source: PubMed Central journal article supplement — Diabetes. 2013 Apr 16;62(5):1490–9. doi: 10.2337/db12-1160 (PMC3636614; doi:10.2337/db12-1160), 2013-04-16
Supplement: supp_db12-1160_DB121160SupplementaryData.pdf [file supp_db12-1160_DB121160SupplementaryData.pdf]

## SUPPLEMENTARY DATA

### Supplementary experimental procedures

#### *AICAR tolerance test*

LKB1 MKO and WT mice were fasted for 11 hours prior to the AICAR tolerance test. Mice were randomized and the test was performed blinded. Mice received AICAR ( $0.5\text{g kg}^{-1}$  body wt) by intraperitoneal injection. Blood was collected from the tail vein and blood glucose concentration was measured via a glucometer (Contour, Bayer Health Care, Germany).

#### *Treadmill exercise test*

Prior to the treadmill exercise test, all mice were acclimatized on a treadmill with electric shockers. Acclimatization was done for 3 days with 2 days rest prior to testing day. Acclimatization consisted of 2 min at rest in the treadmill apparatus (TSE Systems GmbH, Germany) followed by running at 0% incline: Day 1) 5 min at 10 m/min and 5 min at 14 m/min, Day 2) 5 min at 14 m/min and 5 min at 17 m/min, Day 3) 10 min at 17 m/min. The maximal running speed test was performed blinded and the mice started at 10.8 m/min and increased by 2.4 m/min every 2nd min until the mice were unable to keep up with the treadmill. Cut-off speed was defined as the maximal running speed.

#### *Measurement of respiratory exchange ratio and oxygen uptake at rest and during treadmill exercise*

For recording during rest, mice were acclimatized to individual cages for 24 hours prior to measurement. The mice were allowed access to chow food and water ad libitum at all times while housed in individual cages. Immediately prior to recording, the cages were sealed and  $\text{O}_2$  uptake and  $\text{CO}_2$  production were measured for 24h using a CaloSys apparatus (TSE Systems GmbH, Germany). The respiratory exchange ratio (RER) was calculated as  $\text{VCO}_2$  production/ $\text{VO}_2$  uptake. For recording during exercise the mice were rested for two to four days after the treadmill exercise test. Subsequently LKB1 MKO and WT mice were run for 24 min on the treadmill. The LKB1 MKO mice were assigned to run at 60% (12.5 m/min) of their maximal running speed, whereas WT mice were randomized to run at either 30% (12.5 m/min) or 60% (25 m/min) of their maximal running speed. AMPK $\alpha$ 2 and respective WT mice were exercised at 50% of their maximal running speed, corresponding to 13m/min and 18m/min, respectively. During the exercise bout  $\text{O}_2$  uptake and  $\text{CO}_2$  production were measured and RER was calculated as  $\text{VCO}_2$  production/ $\text{VO}_2$  uptake. %CHO use was calculated as  $(\text{RER}-0.7)/0.3$  and %FAT use as  $(100\%-\%CHO)$ . CHO utilization was calculated as  $((20\text{kJ/L} \cdot \text{VO}_2 \text{ uptake}) \cdot \%CHO)$  and FAT utilization was calculated as  $((20\text{kJ/L} \cdot \text{VO}_2 \text{ uptake}) \cdot \%FAT)$ .

#### *Fatty acid oxidation in isolated muscle*

LKB1 MKO and WT mice were anaesthetized with sodium pentobarbital ( $6\text{ mg } 100\text{g}^{-1}$  body wt) and *extensor digitorum longus* (EDL) muscles were carefully dissected tendon to tendon for muscle incubations. Fatty acid (FA) metabolism experiments were conducted using procedures described previously (1;2). Isolated EDL muscles were placed in warmed ( $30^\circ\text{C}$ ) Krebs-Henseleit Ringer buffer pH 7.4 containing 2 mM pyruvate, 2% fatty acid free BSA and 0.5 mM palmitic acid. Palmitic acid was dissolved in ethanol and a small volume was added to the buffer ( $<1\%$  total buffer volume) to achieve the desired palmitate concentration. The proximal and distal tendons of isolated EDL muscles were tied with silk suture and mounted to a force transducer in a 15 ml incubation reservoir (Radnoti, CA, USA). After an initial incubation of 20 min at resting tension (4-5 mN), the incubation buffer was replaced with the same buffer described above supplemented with  $0.5\text{ }\mu\text{Ci/ml}$  of  $[1-^{14}\text{C}]$  palmitate (Amersham BioSciences, UK). FA oxidation was measured in resting or contracting EDL muscle (50 Hz, 350 ms pulse duration, 6 tetani  $\text{min}^{-1}$ ) over 25 min. At the completion of the contraction protocol muscles were removed and snap-frozen in liquid nitrogen and stored at  $-80^\circ\text{C}$ . The incubation medium was collected and gaseous  $^{14}\text{CO}_2$  was liberated with 1 M acetic acid and trapped with vials containing 0.4 ml

## SUPPLEMENTARY DATA

benzethonium hydroxide. Radioactivity in trapped  $^{14}\text{CO}_2$  was determined by liquid scintillation counting using Ultima Gold (Perkin Elmer, MA, USA). Frozen muscle strips were quickly weighed, homogenized in 2:1 chloroform:methanol and 750  $\mu\text{l}$  of the aqueous phase was subjected to liquid scintillation counting. Counts obtained within the aqueous phase were combined with the counts from trapped  $^{14}\text{CO}_2$  to calculate rates of FA oxidation.

### *Glucose transport in isolated muscle*

LKB1 MKO and WT mice were anesthetized by sodium pentobarbital (6 mg  $100\text{g}^{-1}$  body wt). EDL muscles were quickly excised and suspended by ligatures at resting tension (4-5 mN) in incubation chambers (Multi Myograph system; Danish Myo-Technology, Aarhus, Denmark). The muscles were incubated in a pre-buffer (Krebs-Henseleit-Ringer buffer with addition of 8 mM Mannitol, 2 mM pyruvate, and 0.1% BSA) 40 min at  $30^\circ\text{C}$  and oxygenated with a gas mixture containing 95%  $\text{O}_2$  and 5%  $\text{CO}_2$ , as previously described (3). After pre-incubation muscles were stimulated electrically to contract for 10 min (moderate protocol: 2s/15s, 0.2 ms pulses, 100 Hz, 40 V; intense protocol: 10s/30s, 0.1 ms pulses, 100 Hz, 100 V). 2-Deoxyglucose (2-DG) uptake was measured for 10 min either during stimulation (moderate protocol) or immediately after stimulation (intense protocol). Pilot studies indicated that in this mouse model no differences were obtained whether 2-DG uptake was measured during or immediately after stimulation in the intense stimulation protocol. The choice to measure after stimulation in the intense protocol was made to completely simulate conditions used by Koh et al. (4).

### *Glucose clearance during in vivo exercise*

On the experimental day mice fasted for  $\sim 2\text{h}$  were randomized to either the resting or the exercising group. Immediately before the start of the rest/exercise period, mice were given an intraperitoneal injection with a bolus of saline (800  $\mu\text{l}/100\text{g}$  body wt) containing 0.1 mM 2-deoxyglucose and 60  $\mu\text{Ci}/\text{ml}$  2- $^3\text{H}$ deoxyglucose corresponding to  $\sim 12\text{ }\mu\text{Ci}/\text{mouse}$  as previously described (5). WT mice were assigned to run at either 30% (12.5 m/min) or 60% (25 m/min) of their maximal running speed for 20 min, whereas LKB1 MKO mice were assigned to run at 60% (12.5 m/min) of their maximal running speed for 20 min. Resting mice were placed in a treadmill lane which was turned off. Immediately before and during exercise/rest, mice were quickly removed from the treadmill ( $<1\text{ min}$ ) at time points -2, 10, and 20 min to collect tail blood ( $\sim 30\text{ }\mu\text{l}$ ). Plasma glucose concentration was determined by a glucometer (Contour, Bayer Health Care, Germany) and blood samples were placed on  $4^\circ\text{C}$  and centrifuged to collect plasma. After 20 min, mice were euthanized by cervical dislocation. Quadriceps and EDL muscles were removed, immediately frozen in liquid nitrogen and stored at  $-80^\circ\text{C}$  until further processing. Plasma  $^3\text{H}$  activity was measured by scintillation counting, as previously described (5).

The muscles were pulverized and homogenized in an ice cold buffer (20mM Tris-HCl, pH 7.4, 5mM EDTA, 10 mM sodium pyrophosphate, 100 mM sodium fluorid, 2 mM sodium orthovanadate, 10  $\mu\text{g}/\mu\text{l}$  aprotinin, 10  $\mu\text{g}/\mu\text{l}$  leupeptin, 3 mM benzamidine, 1 mM phenylmethylsulfonyl fluoride) using a Tissue lyser (Qiagen, Maryland, USA) 1 min at 30 oscillations per second. The homogenate was divided into 3 parts: in 1) 4.5% PCA was added, in 2) 0.3 M BaOH and 0.3 M  $\text{ZnSO}_4$  were added, and in 3) 4% NP40 and 40% glycerol were added. Part 3) was placed end over end (1h  $4^\circ\text{C}$ ) and centrifuged (16,000g,  $4^\circ\text{C}$ , 20 min) to obtain lysate for further analyses. Part 1) and 2) were centrifuged (13,000g for 4 min) and 2- $^3\text{H}$  deoxyglucose-6-phosphate was determined as previously described (5;6). The muscle glucose clearance calculation was based on the muscle accumulation of 2- $^3\text{H}$ deoxyglucose-6-phosphate activity related to the area under the curve of the plasma  $^3\text{H}$  activity at time point -2, 10 and 20 min using the trapezoid method as previously described (5;7;8). The plasma specific activity at time point 10 and 20 min was calculated by relating the plasma  $^3\text{H}$  activity to the plasma glucose concentration at these time points.

## SUPPLEMENTARY DATA

### *LKB1 and SIK3 - kinase activity assay*

LKB1 or SIK3 were immunoprecipitated (IP) from 500 µg muscle lysate with 2 µg anti-LKB1 (S611A) or 2 µg anti-SIK3 (S226B) in addition to 5 µl protein G sepharose for 2 h at 4°C. IP's were washed twice in 1 ml buffer 1 (50 mM Tris-HCl, pH 7.5, 1 mM EGTA, 1 mM EDTA, 1% Triton X-100, 1 mM sodium orthovanadate, 50 mM sodium fluoride, 5 mM sodium pyrophosphate, 0.27 M sucrose, 0.5mM PMSF and 1 mM DTT) and twice in 1 ml buffer 2 (50 mM Tris pH 7.4, 0.1 mM EGTA and 1 mM DTT). Samples were incubated at 30°C in a final volume of 50 µl (with continuous mixing) containing 50 mM HEPES pH 7.4, 10 mM MgCl<sub>2</sub>, 0.1 mM EGTA, 1 mM DTT, 0.1 mM [<sup>32</sup>Pγ] ATP (~200-300 CPM pmol<sup>-1</sup>) and either 0.2 mM LKBtide (LSNLYHQGKFLQT\*FCGSPLYRRR) or 0.2 mM sakamototide (ALNRTSS\*DSALHRRR) for 30 min. Reactions were terminated by spotting onto P81 paper and immersed in 75 mM phosphoric acid. Filters were washed 3× 10 min with phosphoric acid, rinsed briefly with acetone, air-dried and incorporated <sup>32</sup>P determined by Cherenkov counting.

### *AMPK - kinase activity assay*

Isoform-specific AMPK activity was measured on IP's (using α1 and α2 AMPK antibodies kindly provided by Graham Hardie, University of Dundee, United Kingdom) from 200 µg of muscle lysate protein. After an overnight incubation at 4 °C, the IP was washed once in IP-buffer, once in 240 mM Hepes (pH 7.0) and 480 mM NaCl, and twice in 120 mM Hepes (pH 7.0) and 240 mM NaCl leaving 10 µl of agarose after the last wash. The reaction ran for 30 min at 30 °C in a total volume of 30 µl containing 80 mM Hepes (pH 7.0), 40 mM NaCl, 833 µM DTT, 200 µM AMP, 100 µM AMARA-peptide (Schafer-N, Denmark), 5 mM MgCl<sub>2</sub>, 200 µM ATP and 2 µCi of [<sup>33</sup>P]-ATP (Perkin Elmer, Denmark). The reaction was stopped by adding 10 µl of 1% phosphoric acid to the reaction after which 20 µl was spotted onto P81 filter paper (Whatman, GE Healthcare, Denmark). The filter paper was afterwards washed four times 15 min in 1% phosphoric acid. The dried filter paper was analyzed for activity using a STORM scanner (Molecular Dynamics) and the specific activity was determined by using liquid scintillation (Tri-Carb 2000, Packard Instruments Co.).

### *Light microscopy*

Quadriceps muscles from anesthetized LKB1 and WT mice (pentobarbital 6 mg 100g<sup>-1</sup> body wt) were incubated for 5 minutes in 1g/L procain and fixed by immersion into 2% paraformaldehyde supplemented with 0.15% picric acid in 0.1M phosphate buffer during 4 hours. Twenty to thirty single muscle fibers were isolated from each muscle to perform immunostaining against mitochondria as previously described (9). For the analysis of mitochondria structural organisation, single muscle fibers were incubated over night with a polyclonal rabbit IgG anti-COXIV (Abcam, UK) diluted in buffer A (50 mM glycine, 0.25% bovine serum albumin, 0.03% saponin, and 0.05% sodium azide in PBS). Right after, fibers were washed 3 times 20 minutes in immunobuffer and, then incubated for 2 hours with goat anti rabbit IgG conjugated with Alexa Fluor 488 (Invitrogen, Denmark). After incubation with the secondary antibody, muscle fibers were washed 5 minutes in buffer A with 0.5 µg/ml of Hoechst 33342 (Invitrogen, Denmark), followed by 2 washes, 15 minutes each with buffer A and 1 last 15 minutes wash with PBS. Right after, muscle fibers were mounted with Vectashield (Vector Laboratories, Burlingame, CA). Images of the immunostained single muscle fibers were acquired with a Zeiss LSM780, through a 63x/1.40 oil DIC Plan-Apochromat objective. Hoechst was excited with a 405nm laser line, Alexa Fluor 488 was excited with a 488nm Argon laser. Imaging settings were set so that no signal was detected for the negative controls with no primary antibodies and no saturate pixels were obtained in the different conditions. Confocal z-stacks were acquired and images were processed using Fiji software.

### *Electron microscopy*

## SUPPLEMENTARY DATA

LKB1 MKO and WT mice were fixed by vascular perfusion through the left ventricle of the heart with 2% v/v glutaraldehyde in 0.05 M sodium phosphate buffer (pH 7.2) for 5 min. Quadriceps muscles (n=2) were removed and stored in the same fixative. Following isolation of suitable specimen blocks, the samples were rinsed three times in 0.15 M sodium cacodylate buffer (pH 7.2) and subsequently postfixed in 1% w/v OsO<sub>4</sub> in 0.12 M sodium cacodylate buffer (pH 7.2) for 2 h. The specimens were dehydrated in graded series of ethanol, transferred to propylene oxide and embedded in Epon according to standard procedures. Sections, approximately 80 nm thick, were cut with a Reichert-Jung Ultracut E microtome and collected on copper grids with Formvar supporting membranes. Ultrathin sections were collected on copper grids with Formvar supporting membranes and stained with uranyl acetate and lead citrate, and subsequently examined with a Philips CM 100 TEM (Philips, Eindhoven, The Netherlands), operated at an accelerating voltage of 80 kV and equipped with an OSIS Veleta digital slow scan 2k x 2k CCD camera. A total of 15 fibers were analyzed from each muscle (n=2). All images were obtained in eucentric height for optimal comparison at x24500 magnification. Digital images were recorded with the ITEM software package.

### *Microarray labeling and analysis*

RNA was extracted from tibialis anterior muscle from WT and LKB1 MKO mice using TRIzol. Labelling of 100 ng total RNA (100 ng) was performed using the Gene-Chip Whole Transcript Sense Target Labeling Assay (Affymetrix) followed by hybridization to the GeneChip Mouse Gene 1.0 ST Arrays (Affymetrix) according to the manufacturer's instructions. RMA16 Quantile normalization was performed in the GeneSpring 12 software package (Agilent). To filter out background noise only probe sets with raw intensity values above 100 in >2 samples were included for further analysis (18183 probe sets out of originally 28856 probe sets). Statistical analysis was performed using unpaired t-test followed by Benjamini-Hochberg multiple-testing correction. Only probe sets with a corrected p-value < 0.05 and an absolute fold change above 1.4 were selected for further analysis. Of the 212 probes sets fulfilling the criteria the gene most significantly different was *Stk11* encoding for LKB1. Hierarchical clustering was done with Euclidean distance and centroid linkage. Metabolomics Pathway analysis was performed with Ingenuity Pathway Analysis (Ingenuity Systems) with the following settings: Species=Mouse, Confidence=Experimentally Observed, and Data sources=Ingenuity Expert Findings or Ingenuity Expert Assist Findings.

### *Protein expression and phosphorylation*

Total content and phosphorylation level of proteins were determined from muscle lysates obtained as described above. Protein content was measured by the bicinchoninic acid method (Pierce) in triplicates accepting a coefficient of variation of 5%. Following SDS-PAGE, immunoblotting was performed using the following primary antibodies against total protein content: anti-LKB1 (Santa Cruz Biotechnology, CA, USA), anti-SIK3 (as previously described (10)), anti-pan  $\alpha$ -AMPK (Cell Signaling Technology, MA, USA), anti-AMPK $\alpha$ 2 (Kindly donated by Dr. Hardie, Dundee University), anti-ACC (Streptavidin-HRP, DAKO, Denmark), anti-SIRT1 (Cell Signaling Technology, MA, USA), anti-HDAC4 (Cell Signaling Technology, MA, USA), anti-hexokinase II (Alpha Diagnostic International INC, TX, USA), anti-GLUT4 (Thermo Scientific, MA, USA), anti-CD36 (R&D Systems, UK), anti- $\beta$ -Actin (Sigma-Aldrich, Denmark), anti-tubulin (Sigma-Aldrich, UK), anti-FABPpm (Kindly donated by Dr. Calles-Escandon, Wake Forrest University, NC, USA), anti-FATP1 (Kindly donated by Dr. Stahl, UC Berkeley, CA, USA), anti-FATP4 (Kindly donated by Dr. Füllekrug, University of Heidelberg). Furthermore, anti-p53 and anti-acetylated p53 Lys379 (Cell Signaling Technology, MA, USA) were used. The following primary antibodies against phosphorylated proteins were applied anti- $\alpha$ -AMPK Thr172 phosphorylation (Cell Signaling Technology, MA, USA), anti-ACC Ser212 phosphorylation (Upstate Biotechnology Incorporated, MA, USA), and anti-HDAC4 Ser632 phosphorylation (Cell

SUPPLEMENTARY DATA

Signaling Technology, MA, USA). TBC1D1 protein expression and TBC1D1 Ser237 phosphorylation were determined after immunoprecipitation of TBC1D1, as previously described (11;12). Secondary antibodies used were all species-specific HRP-conjugated immunoglobulins (DakoCytomation, Denmark). Bands were visualized using a Kodak Image Station 2000MM (Kodak, Denmark) and an enhanced chemoluminescence system (ECL<sup>+</sup>, Amersham Pharmacia Biotech, Sweden). Bands were quantified using Kodak 1D 3.6 software.

**Supplementary Table 1.** Blood glucose concentration and 2DG plasma specific activity during treadmill running.

|                      | 0 min   | 10 min     | 20 min      |
|----------------------|---------|------------|-------------|
| Blood glucose (mM)   |         |            |             |
| WT                   |         |            |             |
| Rest                 | 8.8±0.3 | 14.3±0.6*  | 16.5±1.2*£  |
| Ex 60%               | 8.5±0.5 | 11.9±0.4*  | 13.5±0.9*£  |
| LKB1 MKO             |         |            |             |
| Rest                 | 7.9±0.4 | 12.2±0.6*  | 14.5±0.6*£  |
| Ex 60%               | 8.7±0.4 | 12.5±0.7*  | 14.1±0.9*£  |
| Plasma SA (dpm/µmol) |         |            |             |
| WT                   |         |            |             |
| Rest                 | -       | 80101±3927 | 73317±5474£ |
| Ex 60%               | -       | 77960±8576 | 67176±7253£ |
| LKB1 MKO             |         |            |             |
| Rest                 | -       | 86592±4331 | 73576±4263£ |
| Ex 60%               | -       | 72738±5787 | 67176±4678£ |

Data are means ± SE. \*, p<0.05; significantly different from 0 min time point. £, p<0.05; significantly different from 10 min time point.

SUPPLEMENTARY DATA

**Supplementary Table 2.** Mouse expression array analysis revealed 212 different probe sets in WT and LKB MKO muscle.

| <b>Transcripts Cluster Id</b> | <b>Genesymbol</b>          | <b>Fold change</b> | <b>p-value (Corrected)</b> | <b>p-value</b> |
|-------------------------------|----------------------------|--------------------|----------------------------|----------------|
| 10364683                      | Stk11                      | -3.77              | 2.83E-03                   | 8.16E-07       |
| 10427796                      | Npr3                       | 2.60               | 2.83E-03                   | 1.13E-06       |
| 10594517                      | Kbtbd13                    | -1.56              | 2.83E-03                   | 1.20E-06       |
| 10485213                      | Cd82                       | 2.53               | 2.83E-03                   | 1.25E-06       |
| 10564857                      | Idh2                       | -2.13              | 4.99E-03                   | 3.22E-06       |
| 10413222                      | Ppif                       | -1.61              | 4.99E-03                   | 3.29E-06       |
| 10424404                      | Pvt1                       | 1.79               | 5.04E-03                   | 3.60E-06       |
| 10579958                      | Il15                       | -1.82              | 5.57E-03                   | 4.29E-06       |
| 10574532                      | Ces2d-ps Ces2c Ces2b       | 1.40               | 6.25E-03                   | 5.77E-06       |
| 10410984                      | Ckmt2                      | -1.71              | 6.25E-03                   | 5.85E-06       |
| 10427075                      | Krt18                      | 1.44               | 6.70E-03                   | 6.66E-06       |
| 10465559                      | Vegfb                      | -1.48              | 6.70E-03                   | 7.18E-06       |
| 10587107                      | Myo5a                      | 1.78               | 7.60E-03                   | 8.78E-06       |
| 10513143                      | Ptpn3                      | -1.54              | 7.64E-03                   | 9.57E-06       |
| 10349711                      | Slc41a1                    | -1.77              | 8.19E-03                   | 1.08E-05       |
| 10513166                      | Ptpn3                      | -1.65              | 9.68E-03                   | 1.38E-05       |
| 10378857                      | Coro6                      | -1.45              | 1.10E-02                   | 1.91E-05       |
| 10442445                      | Dci                        | -1.51              | 1.10E-02                   | 1.96E-05       |
| 10593937                      | Mpi                        | -1.42              | 1.11E-02                   | 2.23E-05       |
| 10589602                      | Myl3                       | -4.95              | 1.14E-02                   | 2.38E-05       |
| 10513141                      | Ptpn3                      | -1.70              | 1.23E-02                   | 2.90E-05       |
| 10354374                      | Slc40a1                    | -2.04              | 1.23E-02                   | 2.93E-05       |
| 10409240                      | Sema4d                     | 1.44               | 1.23E-02                   | 3.24E-05       |
| 10467842                      | Got1                       | -1.48              | 1.32E-02                   | 3.80E-05       |
| 10438328                      | D16H22S680E                | -1.61              | 1.32E-02                   | 3.88E-05       |
| 10589960                      | Gad1l                      | 1.78               | 1.32E-02                   | 3.98E-05       |
| 10587339                      | Gm10639 Gsta2 Gsta1 Gm3776 | 2.18               | 1.34E-02                   | 4.48E-05       |
| 10603354                      | Magix                      | -1.44              | 1.34E-02                   | 4.55E-05       |
| 10358754                      |                            | 1.85               | 1.36E-02                   | 5.05E-05       |

SUPPLEMENTARY DATA

|          |             |       |          |          |
|----------|-------------|-------|----------|----------|
| 10559694 | Sbk2        | 1.99  | 1.36E-02 | 5.33E-05 |
| 10456254 | Nedd4l      | 1.61  | 1.36E-02 | 5.41E-05 |
| 10544660 | Osbpl3      | 1.62  | 1.36E-02 | 5.55E-05 |
| 10505145 | Musk        | 2.06  | 1.36E-02 | 5.57E-05 |
| 10540105 | Tmem43      | 1.58  | 1.38E-02 | 5.77E-05 |
| 10377662 | Ybx2        | -1.65 | 1.38E-02 | 5.93E-05 |
| 10359861 | Mgst3       | -1.66 | 1.40E-02 | 6.14E-05 |
| 10387768 | Acadvl Dvl2 | -1.44 | 1.40E-02 | 6.30E-05 |
| 10439651 | Cd200       | -1.56 | 1.40E-02 | 6.43E-05 |
| 10404152 | Fam65b      | 1.61  | 1.40E-02 | 6.62E-05 |
| 10483706 | Chrna1      | 2.63  | 1.40E-02 | 6.63E-05 |
| 10441361 | Tiam2 Tfb1m | 2.23  | 1.43E-02 | 7.57E-05 |
| 10513145 | Ptpn3       | -1.74 | 1.44E-02 | 7.66E-05 |
| 10516765 | Serinc2     | 1.64  | 1.61E-02 | 9.06E-05 |
| 10432139 | Zfp641      | 1.45  | 1.67E-02 | 9.88E-05 |
| 10428827 | Tmem65      | -1.43 | 1.67E-02 | 9.91E-05 |
| 10430974 | Arfgap3     | 1.48  | 1.73E-02 | 1.05E-04 |
| 10363455 | Pcbd1       | 2.16  | 1.73E-02 | 1.06E-04 |
| 10361055 | Vash2       | 1.65  | 1.74E-02 | 1.07E-04 |
| 10513158 | Ptpn3       | -1.85 | 1.77E-02 | 1.14E-04 |
| 10354418 | Obfc2a      | 2.13  | 1.89E-02 | 1.31E-04 |
| 10459552 | Spire1      | 1.40  | 1.89E-02 | 1.36E-04 |
| 10513154 | Ptpn3       | -1.72 | 1.89E-02 | 1.36E-04 |
| 10458046 | D0H4S114    | -1.80 | 1.90E-02 | 1.47E-04 |
| 10457205 | Crem        | 1.46  | 1.92E-02 | 1.50E-04 |
| 10389300 | Dhrs11      | -1.46 | 2.05E-02 | 1.67E-04 |
| 10533050 | Hspb8       | 1.54  | 2.06E-02 | 1.72E-04 |
| 10585390 | Sln         | 2.28  | 2.06E-02 | 1.72E-04 |
| 10421648 | Slc25a30    | -1.48 | 2.06E-02 | 1.73E-04 |
| 10394770 | Odc1        | 2.20  | 2.10E-02 | 1.86E-04 |
| 10538459 | Aqp1        | -1.66 | 2.10E-02 | 1.87E-04 |

SUPPLEMENTARY DATA

|          |                            |       |          |          |
|----------|----------------------------|-------|----------|----------|
| 10456904 | Pstpip2                    | 1.50  | 2.10E-02 | 1.95E-04 |
| 10384797 | Ccdc85a                    | -1.53 | 2.10E-02 | 1.97E-04 |
| 10541721 | Spsb2                      | 1.43  | 2.10E-02 | 2.03E-04 |
| 10468311 | Sh3pxd2a                   | 1.42  | 2.10E-02 | 2.10E-04 |
| 10598638 | Mid1ip1                    | -1.57 | 2.10E-02 | 2.12E-04 |
| 10418053 | Kcnma1                     | 1.61  | 2.10E-02 | 2.20E-04 |
| 10605874 | Eda2r                      | 3.12  | 2.10E-02 | 2.23E-04 |
| 10431140 | 1810041L15Rik              | 1.51  | 2.10E-02 | 2.23E-04 |
| 10513156 | Ptpn3                      | -1.72 | 2.15E-02 | 2.32E-04 |
| 10396952 | Ttc9                       | 5.34  | 2.15E-02 | 2.33E-04 |
| 10582295 | Odc1                       | 2.23  | 2.17E-02 | 2.40E-04 |
| 10506254 | Raver2                     | -2.12 | 2.19E-02 | 2.46E-04 |
| 10552311 |                            | 2.35  | 2.19E-02 | 2.48E-04 |
| 10547381 | Lrtm2                      | 1.64  | 2.26E-02 | 2.68E-04 |
| 10513139 | Ptpn3                      | -1.69 | 2.26E-02 | 2.69E-04 |
| 10411853 | Erb2ip                     | 1.45  | 2.26E-02 | 2.69E-04 |
| 10440513 | Cyrr1                      | -1.42 | 2.26E-02 | 2.71E-04 |
| 10492402 | Kcnab1                     | 2.17  | 2.26E-02 | 2.71E-04 |
| 10576639 | Nrp1                       | -1.50 | 2.30E-02 | 2.89E-04 |
| 10595148 | Gsta2 Gm10639 Gsta1 Gm3776 | 2.20  | 2.30E-02 | 2.91E-04 |
| 10604844 | Sms Gm8234                 | 1.63  | 2.30E-02 | 2.95E-04 |
| 10581151 | Rrad                       | 3.44  | 2.31E-02 | 2.99E-04 |
| 10603208 | Mid1                       | 1.48  | 2.31E-02 | 3.00E-04 |
| 10571444 | Slc7a2                     | -1.46 | 2.31E-02 | 3.04E-04 |
| 10549102 | Kcnj8                      | -1.45 | 2.31E-02 | 3.05E-04 |
| 10418011 | Dupd1                      | 1.50  | 2.31E-02 | 3.06E-04 |
| 10513162 | Ptpn3                      | -1.81 | 2.31E-02 | 3.06E-04 |
| 10606868 | Bex1                       | 2.55  | 2.34E-02 | 3.15E-04 |
| 10564502 | Pgpep11                    | 1.77  | 2.35E-02 | 3.17E-04 |
| 10587331 | Gsta1 Gm10639 Gsta2 Gm3776 | 4.30  | 2.35E-02 | 3.20E-04 |
| 10462035 | Ldhb                       | -2.55 | 2.36E-02 | 3.24E-04 |



SUPPLEMENTARY DATA

|          |                            |       |          |          |
|----------|----------------------------|-------|----------|----------|
| 10607524 | Sms Gm8234                 | 1.58  | 2.42E-02 | 3.35E-04 |
| 10451421 | Klhdc3                     | -1.50 | 2.42E-02 | 3.40E-04 |
| 10513152 | Ptpn3                      | -1.68 | 2.44E-02 | 3.70E-04 |
| 10553140 | Tmem143                    | -1.42 | 2.44E-02 | 3.75E-04 |
| 10386473 | Srebf1                     | 1.69  | 2.47E-02 | 3.82E-04 |
| 10529034 | Cgref1                     | 1.78  | 2.48E-02 | 3.88E-04 |
| 10596718 | Slc38a3                    | -1.45 | 2.60E-02 | 4.31E-04 |
| 10434815 | Trp63                      | 1.68  | 2.60E-02 | 4.34E-04 |
| 10505008 | Slc44a1                    | 1.58  | 2.60E-02 | 4.35E-04 |
| 10593293 | Ncam1                      | 3.49  | 2.63E-02 | 4.50E-04 |
| 10587323 | Gsta1 Gsta2 Gm10639 Gm3776 | 4.67  | 2.64E-02 | 4.62E-04 |
| 10348537 | Ramp1                      | -1.46 | 2.64E-02 | 4.64E-04 |
| 10452030 | Plin3                      | -1.76 | 2.65E-02 | 4.70E-04 |
| 10533401 | Cux2                       | -1.50 | 2.65E-02 | 4.71E-04 |
| 10387625 | Chrnbl                     | 1.80  | 2.66E-02 | 4.79E-04 |
| 10574023 | Mt2                        | 4.36  | 2.70E-02 | 4.93E-04 |
| 10574166 | Cpne2                      | 2.49  | 2.78E-02 | 5.27E-04 |
| 10586357 | Cilp                       | 3.05  | 2.78E-02 | 5.30E-04 |
| 10438603 | Igf2bp2                    | 1.41  | 2.80E-02 | 5.41E-04 |
| 10580635 | Ces1d                      | -4.22 | 2.80E-02 | 5.56E-04 |
| 10463599 | Nfkb2                      | 1.44  | 2.80E-02 | 5.59E-04 |
| 10379127 | Spag5                      | 1.59  | 2.80E-02 | 5.59E-04 |
| 10524909 | Nos1                       | -1.59 | 2.85E-02 | 5.73E-04 |
| 10370766 | Gamt                       | 2.01  | 2.97E-02 | 6.09E-04 |
| 10496359 | Emcn                       | -1.44 | 2.99E-02 | 6.22E-04 |
| 10376201 | Gpx3                       | -1.94 | 2.99E-02 | 6.25E-04 |
| 10387909 | Chrne                      | 1.49  | 2.99E-02 | 6.25E-04 |
| 10403076 |                            | 1.72  | 2.99E-02 | 6.29E-04 |
| 10413086 | Adk                        | -1.51 | 3.06E-02 | 6.60E-04 |
| 10465089 | Snx32                      | 1.49  | 3.10E-02 | 6.77E-04 |
| 10408600 | Serpinb6a                  | 1.50  | 3.12E-02 | 6.86E-04 |

SUPPLEMENTARY DATA

|          |               |       |          |          |
|----------|---------------|-------|----------|----------|
| 10529895 | Qdpr          | 1.46  | 3.14E-02 | 7.01E-04 |
| 10484307 | Frzb          | -1.76 | 3.15E-02 | 7.19E-04 |
| 10355567 | Tmbim1        | 1.44  | 3.15E-02 | 7.21E-04 |
| 10517609 | Cda           | -1.44 | 3.17E-02 | 7.37E-04 |
| 10536494 | Cav2          | -1.47 | 3.17E-02 | 7.40E-04 |
| 10447773 | Slc22a3       | 2.57  | 3.17E-02 | 7.46E-04 |
| 10584317 | Esam          | -1.41 | 3.17E-02 | 7.49E-04 |
| 10513160 | Ptpn3         | -1.82 | 3.17E-02 | 7.70E-04 |
| 10556302 | Ampd3         | 1.41  | 3.17E-02 | 7.75E-04 |
| 10590983 | Panx1         | 1.74  | 3.21E-02 | 7.90E-04 |
| 10471844 | Nek6          | 1.50  | 3.35E-02 | 8.38E-04 |
| 10519983 | Fgl2          | 1.87  | 3.35E-02 | 8.39E-04 |
| 10528207 | Cd36          | -1.47 | 3.37E-02 | 8.46E-04 |
| 10445268 | Gpr116        | -1.41 | 3.38E-02 | 8.53E-04 |
| 10472923 | Ak4           | -2.36 | 3.40E-02 | 8.68E-04 |
| 10575993 | 6430548M08Rik | 1.65  | 3.43E-02 | 8.85E-04 |
| 10549097 | Ldhb          | -1.94 | 3.43E-02 | 8.87E-04 |
| 10412909 | Fdft1         | -1.41 | 3.45E-02 | 8.94E-04 |
| 10463355 | Scd2          | 2.31  | 3.45E-02 | 8.99E-04 |
| 10513164 | Ptpn3         | -1.83 | 3.46E-02 | 9.05E-04 |
| 10447317 | Epas1         | -1.51 | 3.47E-02 | 9.17E-04 |
| 10399228 |               | 1.65  | 3.49E-02 | 9.24E-04 |
| 10456400 | Tubb6         | 2.35  | 3.49E-02 | 9.25E-04 |
| 10473022 | Plp2          | 1.72  | 3.65E-02 | 9.94E-04 |
| 10394109 | Rab40b        | 1.44  | 3.65E-02 | 1.00E-03 |
| 10417869 | Anxa7         | 1.57  | 3.65E-02 | 1.01E-03 |
| 10441680 | Pde10a        | 1.63  | 3.66E-02 | 1.02E-03 |
| 10577782 | Htra4         | 3.03  | 3.66E-02 | 1.03E-03 |
| 10491825 | 3110057O12Rik | -1.56 | 3.66E-02 | 1.03E-03 |
| 10346164 | Sdpr          | -1.45 | 3.74E-02 | 1.06E-03 |
| 10443463 | Cdkn1a        | 2.68  | 3.74E-02 | 1.09E-03 |

SUPPLEMENTARY DATA

|          |                   |       |          |          |
|----------|-------------------|-------|----------|----------|
| 10500283 | Car14 Aph1a       | -1.89 | 3.78E-02 | 1.11E-03 |
| 10377245 | Dhrs7c            | -1.54 | 3.78E-02 | 1.12E-03 |
| 10359689 | Atp1b1            | -1.48 | 3.79E-02 | 1.12E-03 |
| 10411519 | Mtap1b            | 2.12  | 3.80E-02 | 1.14E-03 |
| 10379190 | Vtn               | -1.44 | 3.87E-02 | 1.19E-03 |
| 10471247 | Aif11             | 1.52  | 3.88E-02 | 1.19E-03 |
| 10407420 | Net1              | 1.41  | 3.88E-02 | 1.20E-03 |
| 10607089 | Acs14             | 1.46  | 3.88E-02 | 1.21E-03 |
| 10371502 | Fabp3             | -1.50 | 3.88E-02 | 1.22E-03 |
| 10355246 | Acadl             | -1.45 | 3.88E-02 | 1.23E-03 |
| 10502590 | Clca6             | 1.45  | 3.88E-02 | 1.24E-03 |
| 10540952 | Ift122            | 1.47  | 3.89E-02 | 1.26E-03 |
| 10411359 | Plp2 Prickle3     | 1.68  | 3.90E-02 | 1.28E-03 |
| 10475625 | Eid1              | 1.47  | 3.90E-02 | 1.28E-03 |
| 10583242 | Sesn3             | 1.57  | 3.93E-02 | 1.31E-03 |
| 10545401 | Vamp5             | -1.47 | 3.96E-02 | 1.35E-03 |
| 10559796 | Peg3              | 1.91  | 3.98E-02 | 1.36E-03 |
| 10366153 | Rassf9            | -1.43 | 3.98E-02 | 1.37E-03 |
| 10543306 | Tspan12           | -1.48 | 4.00E-02 | 1.38E-03 |
| 10490159 | Pmepa1            | 1.54  | 4.04E-02 | 1.40E-03 |
| 10508614 | Fabp3             | -1.51 | 4.04E-02 | 1.40E-03 |
| 10588495 | Dusp7             | -1.84 | 4.15E-02 | 1.46E-03 |
| 10603346 | Plp2 Prickle3     | 1.68  | 4.21E-02 | 1.52E-03 |
| 10451953 | Lrg1              | -1.66 | 4.21E-02 | 1.52E-03 |
| 10380285 | Tmem100           | 3.22  | 4.23E-02 | 1.53E-03 |
| 10392347 | Pitpnc1           | -1.46 | 4.33E-02 | 1.58E-03 |
| 10542791 | Ppfibp1           | 1.43  | 4.34E-02 | 1.59E-03 |
| 10355536 | Tns1              | -1.49 | 4.37E-02 | 1.62E-03 |
| 10548532 | Klra9 Klra5 Klra3 | -1.52 | 4.37E-02 | 1.63E-03 |
| 10402117 | Rps6ka5           | -1.76 | 4.43E-02 | 1.66E-03 |
| 10397763 | 9030617O03Rik     | -1.80 | 4.44E-02 | 1.67E-03 |

SUPPLEMENTARY DATA

|          |                      |       |          |          |
|----------|----------------------|-------|----------|----------|
| 10344973 | Gdap1                | 2.18  | 4.46E-02 | 1.69E-03 |
| 10362959 | Popdc3               | 1.55  | 4.47E-02 | 1.70E-03 |
| 10367591 | Myct1                | -1.48 | 4.49E-02 | 1.72E-03 |
| 10374998 | Gpr75                | 1.77  | 4.50E-02 | 1.73E-03 |
| 10591620 | Dock6                | -1.42 | 4.50E-02 | 1.73E-03 |
| 10495285 | Sort1                | 1.43  | 4.59E-02 | 1.80E-03 |
| 10502375 | Mtp                  | 1.41  | 4.60E-02 | 1.82E-03 |
| 10533483 | Atp2a2               | 1.53  | 4.61E-02 | 1.83E-03 |
| 10572130 | Lpl                  | -1.42 | 4.64E-02 | 1.85E-03 |
| 10535807 | Flt1                 | -1.44 | 4.68E-02 | 1.89E-03 |
| 10591630 | Dock6                | -1.41 | 4.68E-02 | 1.90E-03 |
| 10475437 | Sord                 | -1.47 | 4.69E-02 | 1.91E-03 |
| 10521678 | Cd38                 | -1.45 | 4.69E-02 | 1.92E-03 |
| 10494889 | Dennd2c              | 1.94  | 4.69E-02 | 1.93E-03 |
| 10347748 | Acsl3 Utp14b         | 1.55  | 4.69E-02 | 1.93E-03 |
| 10491820 | 3110057O12Rik Gm2011 | -1.40 | 4.73E-02 | 1.97E-03 |
| 10424221 | Wdr67                | 1.65  | 4.73E-02 | 1.97E-03 |
| 10533849 | Rilpl1               | -1.50 | 4.76E-02 | 2.00E-03 |
| 10536898 | Irf5                 | -1.68 | 4.76E-02 | 2.01E-03 |
| 10441003 | Runx1                | 2.48  | 4.77E-02 | 2.02E-03 |
| 10555118 | Pak1                 | 1.62  | 4.81E-02 | 2.05E-03 |
| 10490923 | Car2                 | -1.62 | 4.82E-02 | 2.06E-03 |
| 10499899 | Sprr1a               | 1.47  | 4.83E-02 | 2.08E-03 |
| 10505030 | Fsd11                | 1.64  | 4.87E-02 | 2.12E-03 |
| 10467191 | Ankrd1               | 5.68  | 4.90E-02 | 2.15E-03 |
| 10545672 | Mthfd2               | 1.91  | 4.94E-02 | 2.17E-03 |
| 10530536 | Tec                  | 1.56  | 4.94E-02 | 2.17E-03 |
| 10522208 | Uchl1                | 2.11  | 4.99E-02 | 2.20E-03 |

SUPPLEMENTARY DATA

**Supplementary Table 3.** Mouse expression array analysis revealed differences in 27 genes involved lipid metabolism.

| Transcripts Cluster Id | Gene symbol | Gene name                                                                          | Fold change | p-value (Corrected) | p-value  |
|------------------------|-------------|------------------------------------------------------------------------------------|-------------|---------------------|----------|
| 10364683               | Stk11       | serine/threonine kinase 11 (LKB1)                                                  | -3.77       | 2.83E-03            | 8.16E-07 |
| 10579958               | Il15        | interleukin 15                                                                     | -1.82       | 5.57E-03            | 4.29E-06 |
| 10587107               | Myo5a       | myosin VA                                                                          | 1.78        | 7.60E-03            | 8.78E-06 |
| 10442445               | Dci         | enoyl-CoA delta isomerase 1                                                        | -1.51       | 1.10E-02            | 1.96E-05 |
| 10467842               | Got1        | glutamate oxaloacetate transaminase 1                                              | -1.48       | 1.32E-02            | 3.80E-05 |
| 10456254               | Nedd4l      | neural precursor cell expressed, developmentally down-regulated gene 4-like        | 1.61        | 1.36E-02            | 5.41E-05 |
| 10387768               | Acadvl      | acyl-Coenzyme A dehydrogenase, very long chain                                     | -1.44       | 1.40E-02            | 6.30E-05 |
| 10457205               | Crem        | cAMP responsive element modulator                                                  | 1.46        | 1.92E-02            | 1.50E-04 |
| 10598638               | Mid1ip1     | mid1 interacting protein 1                                                         | -1.57       | 2.10E-02            | 2.12E-04 |
| 10418053               | Kcnma1      | potassium large conductance calcium-activated channel, subfamily M, alpha member 1 | 1.61        | 2.10E-02            | 2.20E-04 |
| 10581151               | Rrad        | Ras-related associated with diabetes                                               | 3.44        | 2.31E-02            | 2.99E-04 |
| 10386473               | Srebfl      | sterol regulatory element binding transcription factor 1                           | 1.69        | 2.47E-02            | 3.82E-04 |
| 10574023               | Mt2         | metallothionein 2                                                                  | 4.36        | 2.70E-02            | 4.93E-04 |
| 10580635               | Ces1d       | carboxylesterase 1D                                                                | -4.22       | 2.80E-02            | 5.56E-04 |
| 10524909               | Nos1        | nitric oxide synthase 1, neuronal                                                  | -1.59       | 2.85E-02            | 5.73E-04 |
| 10528207               | Cd36        | CD36 antigen                                                                       | -1.47       | 3.37E-02            | 8.46E-04 |
| 10412909               | Fdft1       | farnesyl diphosphate farnesyl transferase 1                                        | -1.41       | 3.45E-02            | 8.94E-04 |
| 10463355               | Scd2        | stearoyl-Coenzyme A desaturase 2                                                   | 2.31        | 3.45E-02            | 8.99E-04 |
| 10447317               | Epas1       | endothelial PAS domain protein 1                                                   | -1.51       | 3.47E-02            | 9.17E-04 |
| 10443463               | Cdkn1a      | cyclin-dependent kinase inhibitor 1A (P21)                                         | 2.68        | 3.74E-02            | 1.09E-03 |
| 10607089               | Acsl4       | acyl-CoA synthetase long-chain family member 4                                     | 1.46        | 3.88E-02            | 1.21E-03 |
| 10355246               | Acadl       | acyl-Coenzyme A dehydrogenase, long-chain                                          | -1.45       | 3.88E-02            | 1.23E-03 |
| 10508614               | Fabp3       | fatty acid binding protein 3, muscle and heart                                     | -1.51       | 4.04E-02            | 1.40E-03 |
| 10502375               | Mttp        | microsomal triglyceride transfer protein                                           | 1.41        | 4.60E-02            | 1.82E-03 |
| 10533483               | Atp2a2      | ATPase, Ca <sup>++</sup> transporting, cardiac muscle, slow twitch 2               | 1.53        | 4.61E-02            | 1.83E-03 |
| 10572130               | Lpl         | lipoprotein lipase                                                                 | -1.42       | 4.64E-02            | 1.85E-03 |
| 10521678               | Cd38        | CD38 antigen                                                                       | -1.45       | 4.69E-02            | 1.92E-03 |

## SUPPLEMENTARY DATA

**Supplementary Figure 1.** LKB1 MKO mice are AICAR intolerant. Mice were injected intraperitoneally with AICAR (0.5 g/kg body weight) and blood drawn from the tail vein was used for blood glucose measurement (n=18-23). Experiments were performed blinded and in randomized order. \*\*, p<0.01; significantly different from WT. Data are presented as means  $\pm$  SEM.

### AICAR tolerance test

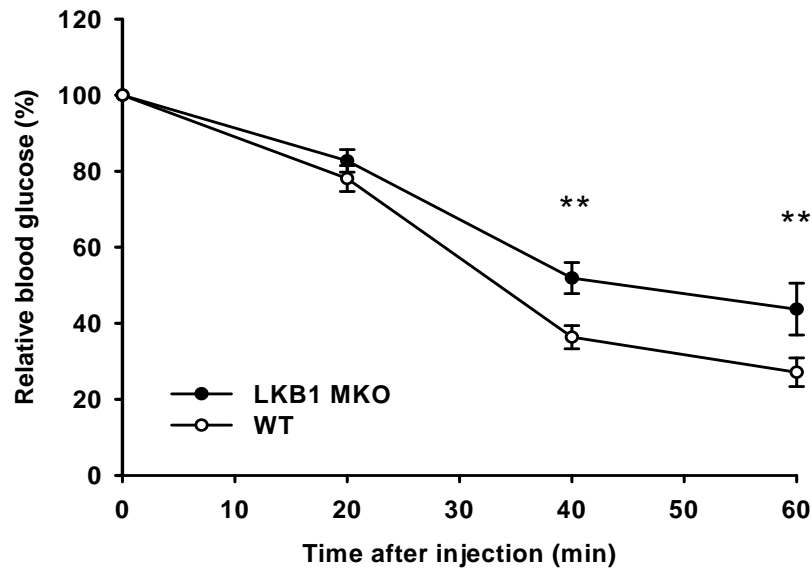

**Supplementary Figure 2.** LKB1 MKO has normal resting oxygen uptake and RER under fed conditions. At rest LKB1 MKO and WT mice had similar A) oxygen uptake and B) RER both at night and during light periods determined by indirect calorimetry. Data are presented as means  $\pm$  SEM (n=8).

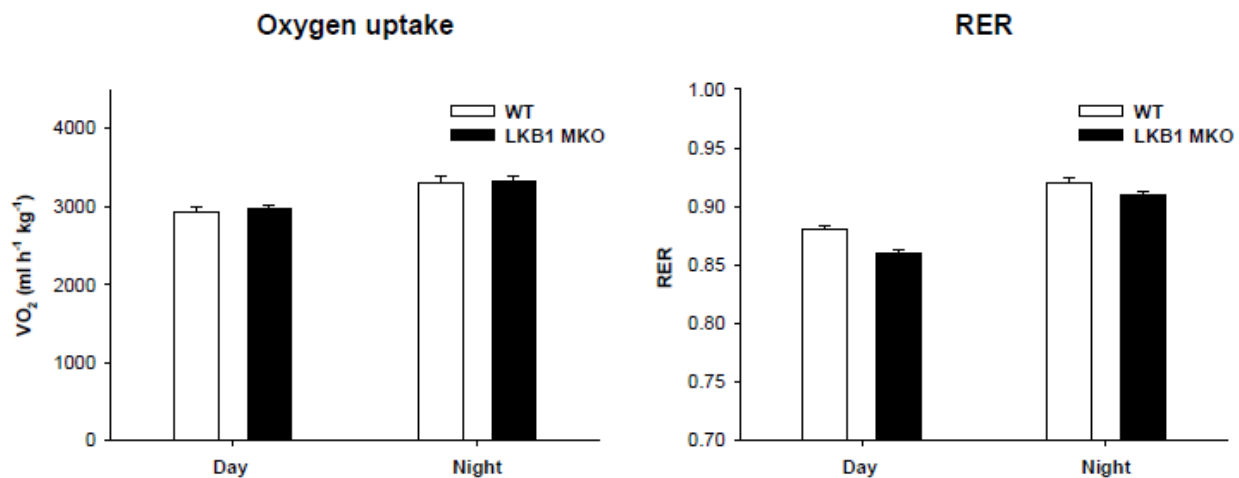

SUPPLEMENTARY DATA

**Supplementary Figure 3.** AMPK $\alpha$ 2 KO mice have reduced oxygen uptake, but normal RER and fat oxidation during exercise. A) Exercise capacity test were performed by treadmill running, where maximum speed was the cut-off speed found by increasing running speed by 2.4 m/min every 2<sup>nd</sup> minute until exhaustion. AMPK $\alpha$ 2 KO mice had a reduced treadmill running speed capacity compared to WT littermates. B) AMPK  $\alpha$ 2 KO mice displayed normal RER, but C) lower oxygen uptake ( $\text{ml h}^{-1} \text{kg}^{-1}$ ), determined by indirect calorimetry during the last 18 min of a 36 min exercise bout at the same relative intensity (50% of max running speed). D-E) During the last 18 min of a 36 min exercise bout whole body carbohydrate- and fat oxidation ( $\text{kJ h}^{-1} \text{kg}^{-1}$ ) was similar between genotypes. Data are presented as means  $\pm$  SEM (n=8). \*\*/\*\*\*,  $p < 0.01/p < 0.001$ ; significantly different from WT.

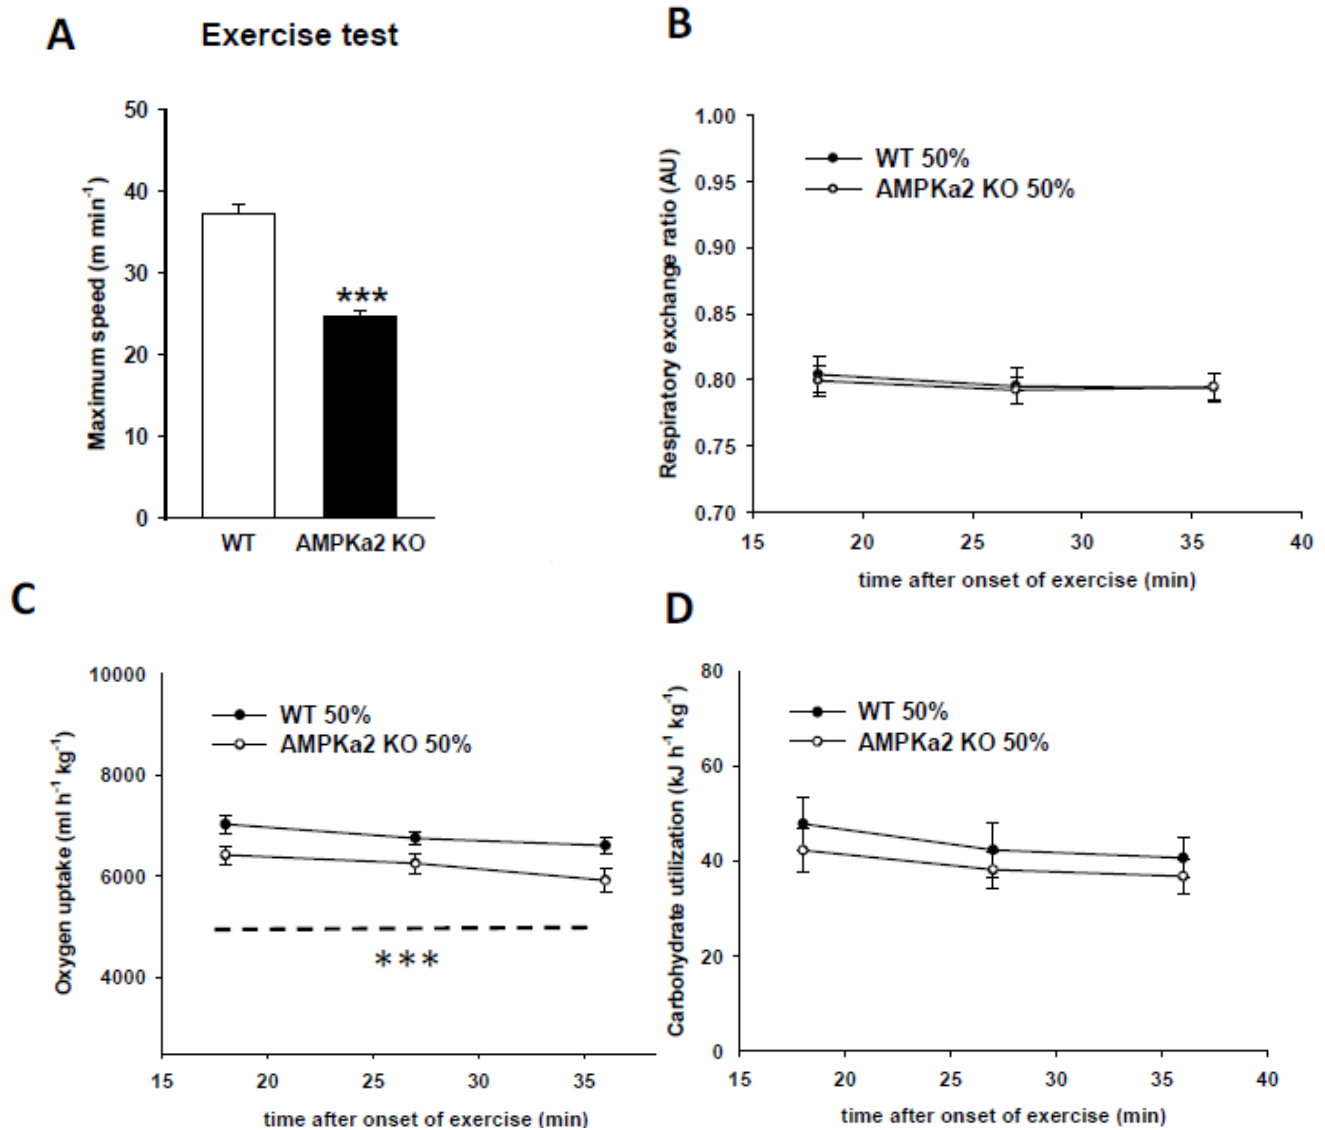

SUPPLEMENTARY DATA

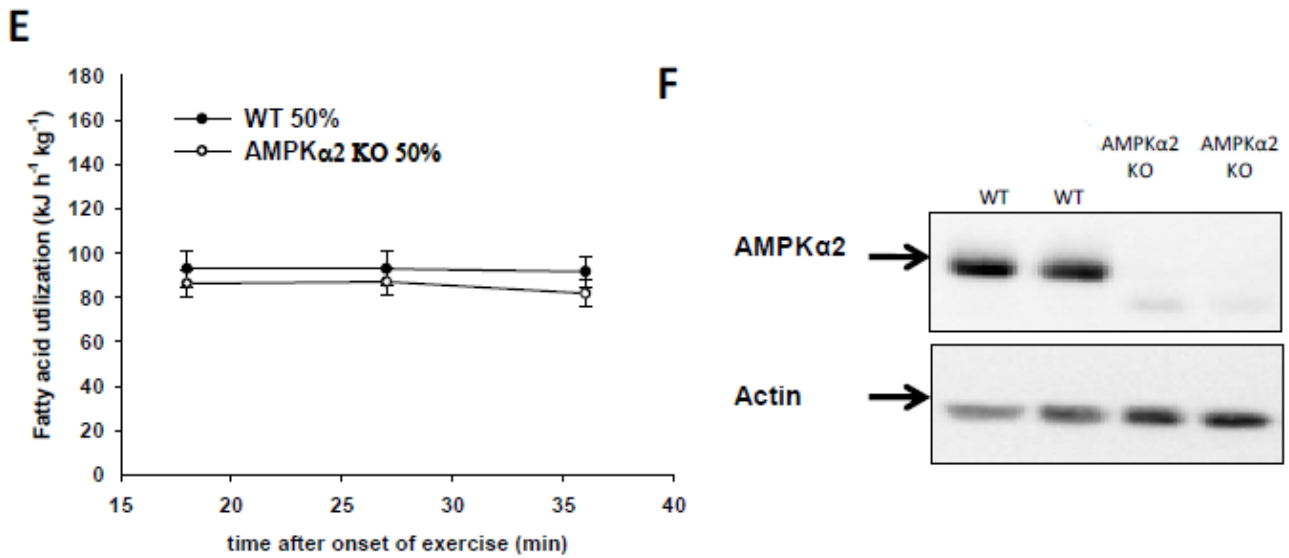

**Supplementary Figure 4.** Nucleotide levels in LKB1 MKO and WT muscle at rest and after exercise. There was no difference in resting muscle nucleotide levels between WT and LKB1 MKO mice. Furthermore, AMP:ATP and ADP:ATP ratios increased with exercise to a similar extent in both genotypes. Data are presented as means ± SEM (n=7-10).

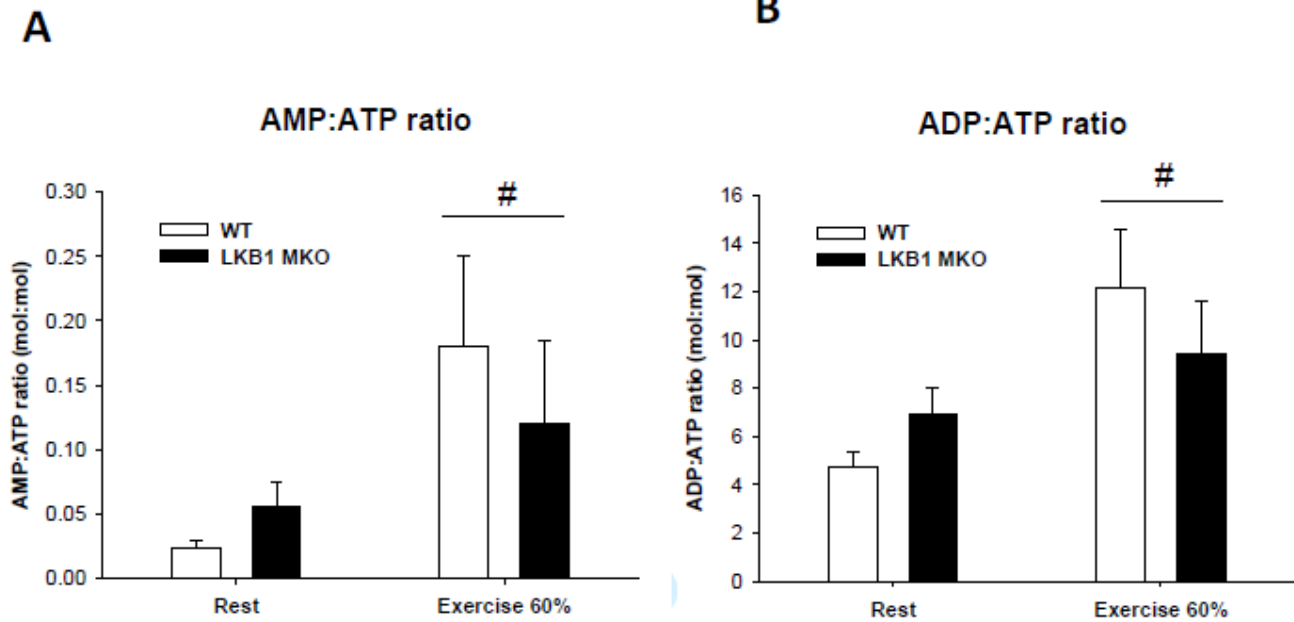



SUPPLEMENTARY DATA

**Supplementary Figure 5.** Lipid binding proteins, GLUT4 and HKII expression in muscle lacking LKB1 protein. The lipid binding proteins A) fatty acid translocase CD36 (FAT/CD36) and C-D) fatty acid transport protein 1 and 4 were equally expressed in quadriceps muscle from WT and LKB1 MKO mice, whereas the B) membrane bound fatty acid binding protein (FABPpm) was reduced in LKB1 MKO muscle (n=7-13). E) Glucose transporter 4 (GLUT4) was higher in quadriceps muscle from LKB1 MKO mice (n=23-28), whereas hexokinase II protein expression (HKII) was similarly expressed in quadriceps muscle from WT and LKB1 MKO mice (n=23-28). Data are presented as means  $\pm$  SEM. \*, p<0.05; significantly different from WT.

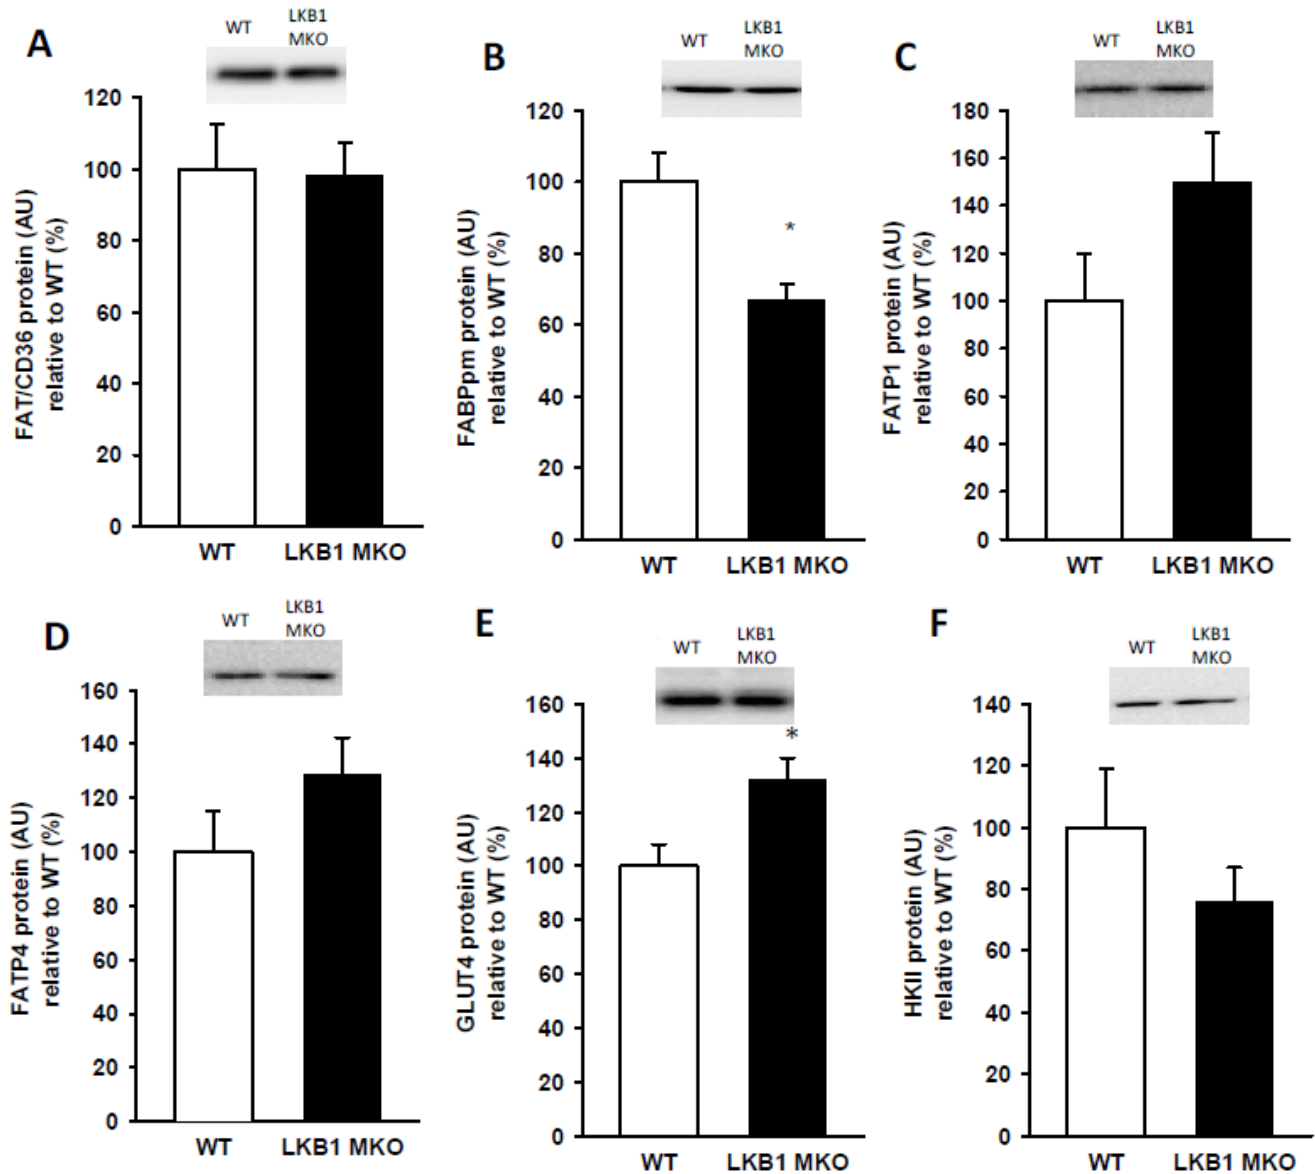

## SUPPLEMENTARY DATA

### Reference List

1. Steinberg,GR, Bonen,A, Dyck,DJ: Fatty acid oxidation and triacylglycerol hydrolysis are enhanced after chronic leptin treatment in rats. *Am J Physiol Endocrinol Metab* 282:E593-E600, 2002
2. Dzamko,N, Schertzer,JD, Ryall,JG, Steel,R, Macaulay,SL, Wee,S, Chen,ZP, Michell,BJ, Oakhill,JS, Watt,MJ, Jorgensen,SB, Lynch,GS, Kemp,BE, Steinberg,GR: AMPK-independent pathways regulate skeletal muscle fatty acid oxidation. *J Physiol* 586:5819-5831, 2008
3. Jorgensen,SB, Viollet,B, Andreelli,F, Frosig,C, Birk,JB, Schjerling,P, Vaulont,S, Richter,EA, Wojtaszewski,JF: Knockout of the alpha2 but not alpha1 5'-AMP-activated protein kinase isoform abolishes 5-aminoimidazole-4-carboxamide-1-beta-4-ribofuranosidebut not contraction-induced glucose uptake in skeletal muscle. *J Biol Chem* 279:1070-1079, 2004
4. Koh,HJ, Toyoda,T, Fujii,N, Jung,MM, Rathod,A, Middelbeek,RJ, Lessard,SJ, Treebak,JT, Tsuchihara,K, Esumi,H, Richter,EA, Wojtaszewski,JF, Hirshman,MF, Goodyear,LJ: Sucrose nonfermenting AMPK-related kinase (SNARK) mediates contraction-stimulated glucose transport in mouse skeletal muscle. *Proc Natl Acad Sci U S A* 107:15541-15546, 2010
5. Maarbjerg,SJ, Jorgensen,SB, Rose,AJ, Jeppesen,J, Jensen,TE, Treebak,JT, Birk,JB, Schjerling,P, Wojtaszewski,JF, Richter,EA: Genetic impairment of {alpha}2-AMPK signaling does not reduce muscle glucose uptake during treadmill exercise in mice. *Am J Physiol Endocrinol Metab* 297:E924-E934, 2009
6. Ferre,P, Leturque,A, Burnol,AF, Penicaud,L, Girard,J: A method to quantify glucose utilization in vivo in skeletal muscle and white adipose tissue of the anaesthetized rat. *Biochem J* 228:103-110, 1985
7. Fueger,PT, Bracy,DP, Malabanan,CM, Pencek,RR, Wasserman,DH: Distributed control of glucose uptake by working muscles of conscious mice: roles of transport and phosphorylation. *Am J Physiol Endocrinol Metab* 286:E77-E84, 2004
8. Kraegen,EW, James,DE, Jenkins,AB, Chisholm,DJ: Dose-response curves for in vivo insulin sensitivity in individual tissues in rats. *Am J Physiol* 248:E353-E362, 1985
9. Ploug,T, van,DB, Ai,H, Cushman,SW, Ralston,E: Analysis of GLUT4 distribution in whole skeletal muscle fibers: identification of distinct storage compartments that are recruited by insulin and muscle contractions. *J Cell Biol* 142:1429-1446, 1998
10. Sakamoto,K, Goransson,O, Hardie,DG, Alessi,DR: Activity of LKB1 and AMPK-related kinases in skeletal muscle: effects of contraction, phenformin, and AICAR. *Am J Physiol Endocrinol Metab* 287:E310-E317, 2004
11. Pehmoller,C, Treebak,JT, Birk,JB, Chen,S, Mackintosh,C, Hardie,DG, Richter,EA, Wojtaszewski,JF: Genetic disruption of AMPK signaling abolishes both contraction- and insulin-stimulated TBC1D1 phosphorylation and 14-3-3 binding in mouse skeletal muscle. *Am J Physiol Endocrinol Metab* 297:E665-E675, 2009
12. Chen,S, Murphy,J, Toth,R, Campbell,DG, Morrice,NA, Mackintosh,C: Complementary regulation of TBC1D1 and AS160 by growth factors, insulin and AMPK activators. *Biochem J* 409:449-459, 2008
